# Supplementary material for: Mechanistic exploration and experimental validation of the Xiaochaihu decoction for the treatment of breast cancer by network pharmacology
Source: publisher site journal article supplement (doi:10.18632/aging.205798), 2024-05-13
Supplement: Supplementary file [file aging-v16i9-205798-supplementary-material-SD1.pdf]

SUPPLEMENTARY FIGURES

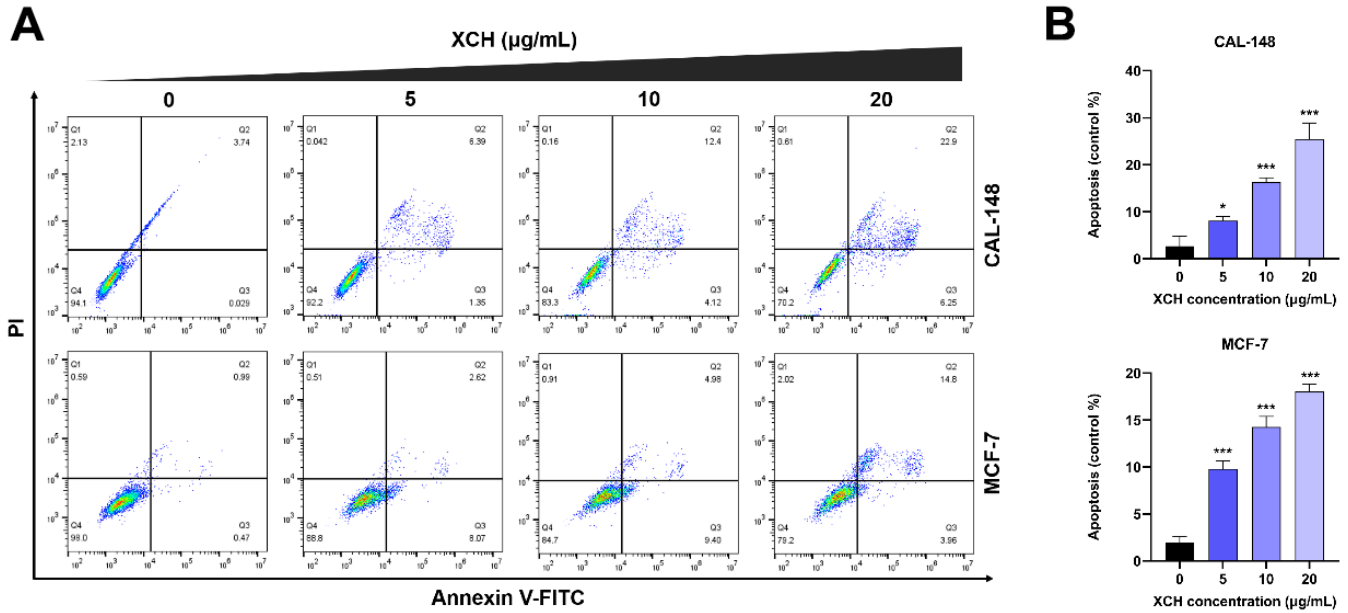

**Supplementary Figure 1.** (A, B) Detection of the effect of XCH decoction on breast cancer cell apoptosis by flow cytometry. The data were shown as the mean ± SD of three experiments. \* $P < 0.05$ , \*\* $P < 0.01$ , \*\*\* $P < 0.001$  compared with the control group.

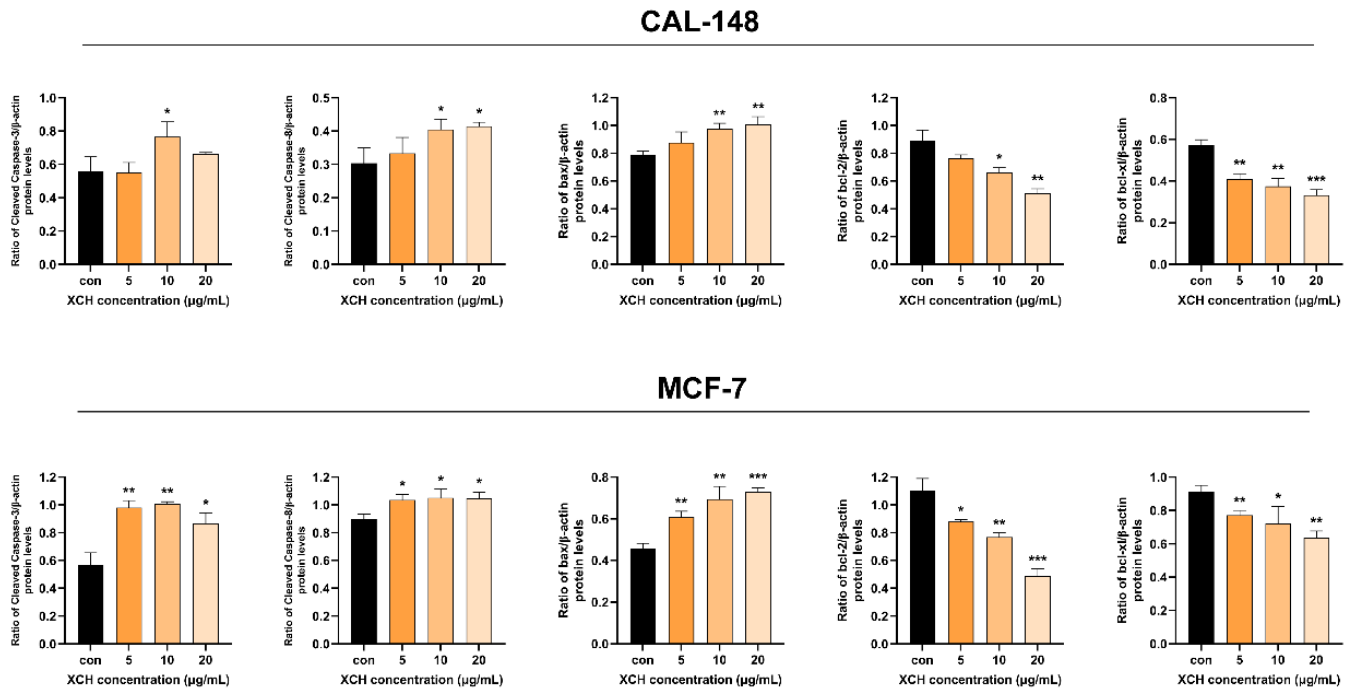

**Supplementary Figure 2.** Quantification of Cleaved caspase 3, 8, bax, bcl-2 and bcl-xl. The data were shown as the mean ± SD of three experiments. \* $P < 0.05$ , \*\* $P < 0.01$ , \*\*\* $P < 0.001$  compared with the control group.

**A**

**CAL-148**

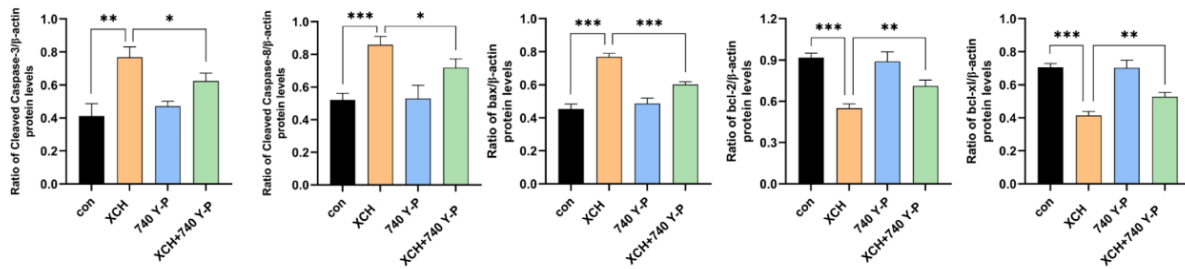

**MCF-7**

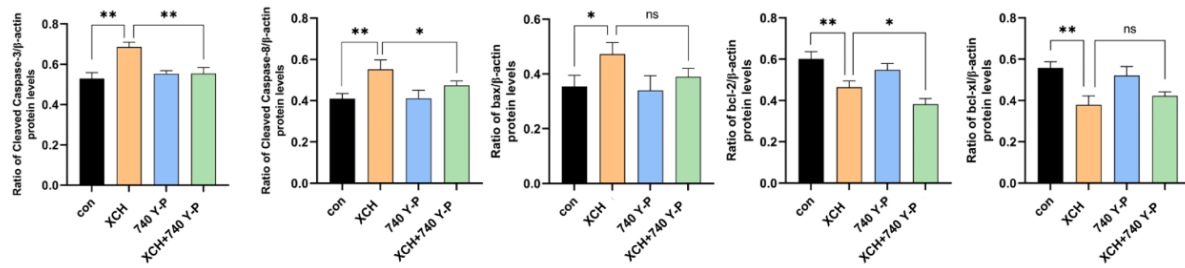

**B**

**CAL-148**

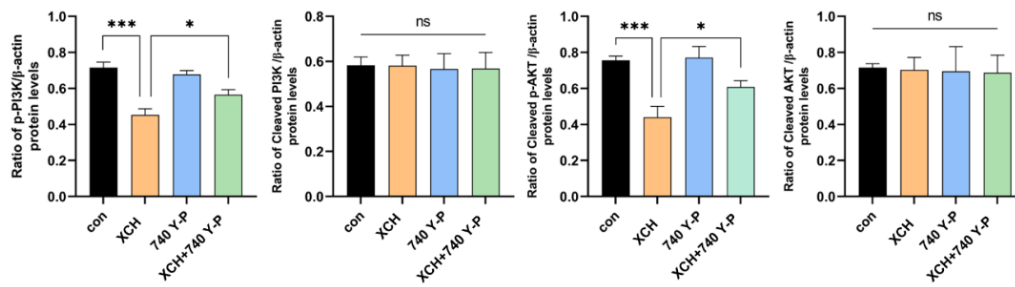

**MCF-7**

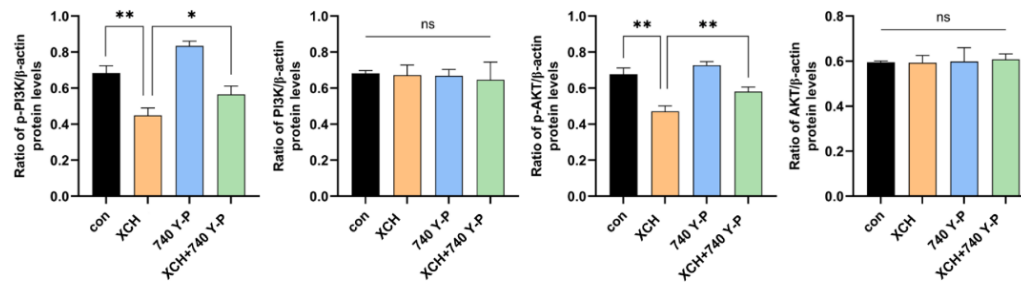

**Supplementary Figure 3. (A, B)** Quantification of Western blot. Cells were treated with or without XCH decoction for 48 h after PI3K agonist (740 Y-P, 25 μg/mL) pretreatment for 2 h. The data were shown as the mean ± SD of three experiments. \**P* < 0.05, \*\**P* < 0.01, \*\*\**P* < 0.001 compared with the control group.

**A****CAL-148**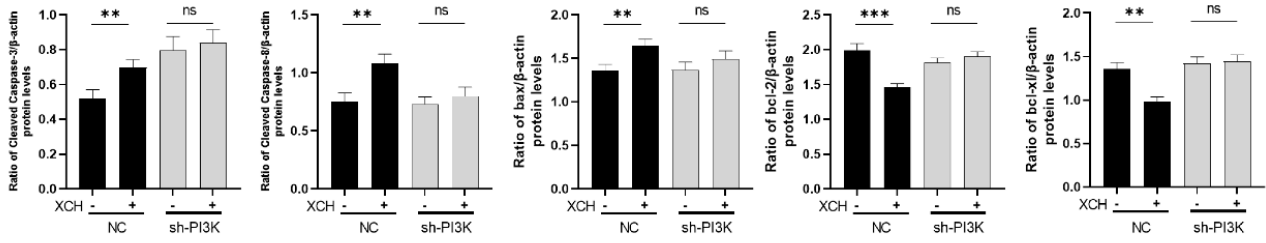**MCF-7**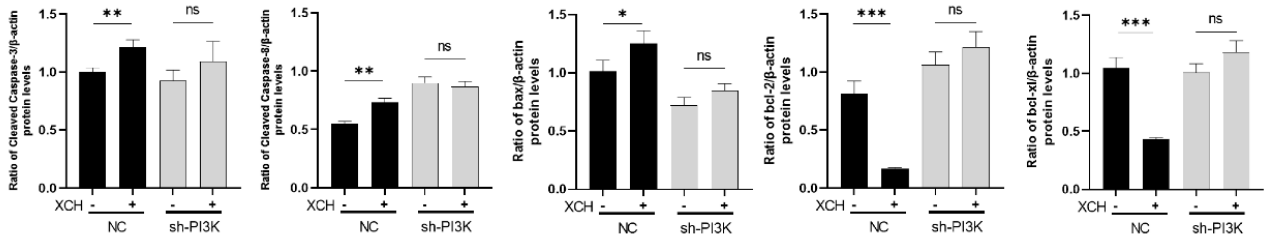**B****CAL-148**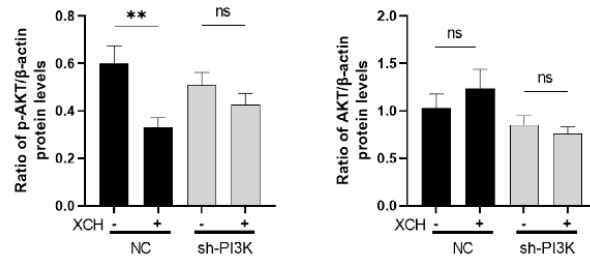**MCF-7**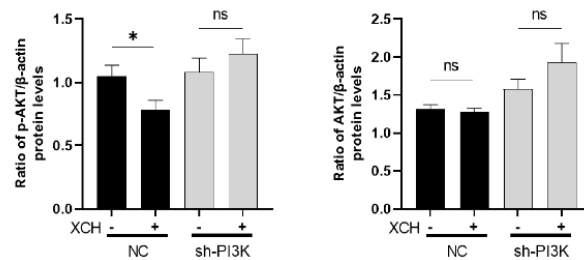

**Supplementary Figure 4.** (A, B) Quantification of Western blot. The data were shown as the mean  $\pm$  SD of three experiments. \* $P < 0.05$ , \*\* $P < 0.01$  compared with the control group.
