# Supplementary material for: Mechanistic exploration and experimental validation of the Xiaochaihu decoction for the treatment of breast cancer by network pharmacology
Source: publisher site journal article supplement (doi:10.18632/aging.205798), 2024-05-13
Supplement: Supplementary file [file aging-v16i9-205798-supplementary-material-SD3.pdf]

**Supplementary Table 2. Molecular docking binding energy.**

| <b>Compound name</b> | <b>Gene</b> | <b>Binding energy (kcal/mol)</b> |
|----------------------|-------------|----------------------------------|
| rutin                | PI3K        | -9.8                             |
| rutin                | Akt         | -10.6                            |
| quercetin            | PI3K        | -9.0                             |
| quercetin            | Akt         | -8.9                             |
| chrysin              | PI3K        | -8.9                             |
| chrysin              | Akt         | -8.5                             |
| naringenin           | PI3K        | -8.5                             |
| naringenin           | Akt         | -8.5                             |
